# Supplementary material for: A Clinically Practical Postpartum Depression Predictor: Machine Learning Model Based on Simplified Indicators
Source: Research Square preprint supplement (doi:10.21203/rs.3.rs-7079798/v1), 2025-08-01
Supplement: Supplementary file 1 [file beaa0b9bd3340b157a34abc2.docx]

Table S2 Hyperparameters of all models

| **No.** | **Machine learning models** | **Hyperparameters** |
| --- | --- | --- |
| 1 | LogisticRegression | {'solver': 'lbfgs', 'penalty': 'l2', 'class_weight': 'balanced', 'C': 100} |
| 2 | RandomForest | {'oob_score': False, 'n_estimators': 200, 'min_samples_split': 20, 'min_samples_leaf': 1, 'max_features': 'sqrt', 'max_depth': 7, 'class_weight': None, 'bootstrap': False} |
| 3 | GradientBoosting | {'subsample': 0.8, 'n_estimators': 50, 'min_samples_split': 10, 'min_samples_leaf': 6, 'max_depth': 5, 'learning_rate': 0.01} |
| 4 | XGBoost | {'n_estimators': 100, 'min_child_weight': 1, 'max_depth': 3, 'learning_rate': 0.1, 'gamma': 0.2, 'colsample_bytree': 0.8} |
| 5 | LightGBM | {'n_estimators': 200, 'min_child_samples': 5, 'max_depth': 5, 'learning_rate': 0.01, 'lambda_l2': 0.1, 'lambda_l1': 1, 'feature_fraction': 0.9} |
| 6 | CatBoost | {'n_estimators': 100, 'min_data_in_leaf': 5, 'learning_rate': 0.01, 'l2_leaf_reg': 1, 'depth': 5, 'bagging_temperature': 2} |
| 7 | AdaBoost | {'n_estimators': 50, 'learning_rate': 0.1} |
| 8 | MLP | {'solver': 'adam', 'hidden_layer_sizes': (100,), 'alpha': 0.001, 'activation': 'relu'} |
| 9 | SVM | {'kernel': 'rbf', 'gamma': 0.001, 'degree': 3, 'C': 0.01} |
| 10 | NB | {'var_smoothing': 1e-09} |
| 11 | DT | {'min_samples_split': 2, 'min_samples_leaf': 2, 'max_depth': 5, 'criterion': 'gini'} |
