# Supplementary material for: A Clinically Practical Postpartum Depression Predictor: Machine Learning Model Based on Simplified Indicators
Source: Research Square preprint supplement (doi:10.21203/rs.3.rs-7079798/v1), 2025-08-01
Supplement: Supplementary file 2 [file ead46b04ab952ffa5d875a8d.docx]

Table S1 - Training set between-group comparative analysis results

| **No.** | **Variables** | Not PPD｜(N=3041) | PPD｜(N=467) | Total｜(N=3508) | **Statistic** | ***P* Value** | **Test Method** |
| --- | --- | --- | --- | --- | --- | --- | --- |
| 1 | Age(years) | 28.00 [26.00;31.00] | 28.00 [26.00;31.00] | 28.00 [26.00;31.00] | 1.691 | 0.091 | Wilcoxon rank-sum test |
| 2 | Ethnicity |  |  |  | 1.976 | 0.160 | Chi-squared test |
|  | Han | 2996 (98.52%) | 456 (97.64%) | 3452 (98.40%) |  |  |  |
|  | Others | 45 (1.48%) | 11 (2.36%) | 56 (1.60%) |  |  |  |
| 3 | Residence |  |  |  | 0.008 | 0.930 | Chi-squared test |
|  | Native | 2997 (98.55%) | 460 (98.50%) | 3457 (98.55%) |  |  |  |
|  | Others | 44 (1.45%) | 7 (1.50%) | 51 (1.45%) |  |  |  |
| 4 | Education level |  |  |  | 0.313 | 0.754 | Wilcoxon rank-sum test |
|  | Junior high school or lower | 252 (8.29%) | 40 (8.57%) | 292 (8.32%) |  |  |  |
|  | High school/Vocational school | 474 (15.59%) | 77 (16.49%) | 551 (15.71%) |  |  |  |
|  | College/University | 2214 (72.80%) | 332 (71.09%) | 2546 (72.58%) |  |  |  |
|  | Master's degree or higher | 101 (3.32%) | 18 (3.85%) | 119 (3.39%) |  |  |  |
| 5 | Current occupation |  |  |  | - | 0.475 | Fisher's exact test |
|  | Unemployed | 589 (19.37%) | 104 (22.27%) | 693 (19.75%) |  |  |  |
|  | Full-time | 1766 (58.07%) | 265 (56.75%) | 2031 (57.90%) |  |  |  |
|  | Freelancer | 683 (22.46%) | 98 (20.99%) | 781 (22.26%) |  |  |  |
|  | Student | 3 (0.10%) | 0 ( 0.0%) | 3 (0.09%) |  |  |  |
| 6 | Weekly work study hours | 40.00 [10.00;48.00] | 40.00 [8.15;48.00] | 40.00 [9.90;48.00] | 0.842 | 0.400 | Wilcoxon rank-sum test |
| 7 | Annual household income(CNY) |  |  |  | 2.642 | 0.008 | Wilcoxon rank-sum test |
|  | <30k | 81 (2.66%) | 21 (4.50%) | 102 (2.91%) |  |  |  |
|  | 30k-80k | 360 (11.84%) | 73 (15.63%) | 433 (12.34%) |  |  |  |
|  | 80k-150k | 1029 (33.84%) | 151 (32.33%) | 1180 (33.64%) |  |  |  |
|  | 150k-300k | 1163 (38.24%) | 173 (37.04%) | 1336 (38.08%) |  |  |  |
|  | 300k-500k | 290 (9.54%) | 31 (6.64%) | 321 (9.15%) |  |  |  |
|  | >500k | 118 (3.88%) | 18 (3.85%) | 136 (3.88%) |  |  |  |
| 8 | Household area(m2) | 120.00 [100.00;140.00] | 120.00 [91.00;140.00] | 120.00 [100.00;140.00] | 1.932 | 0.053 | Wilcoxon rank-sum test |
| 9 | Only child |  |  |  | 0.008 | 0.929 | Chi-squared test |
|  | Yes | 886 (29.14%) | 137 (29.34%) | 1023 (29.16%) |  |  |  |
|  | No | 2155 (70.86%) | 330 (70.66%) | 2485 (70.84%) |  |  |  |
| 10 | Marital status |  |  |  | - | 0.000 | Fisher's exact test |
|  | Married | 3012 (99.05%) | 453 (97.00%) | 3465 (98.77%) |  |  |  |
|  | Single | 27 (0.89%) | 10 (2.14%) | 37 (1.05%) |  |  |  |
|  | Divorced | 2 (0.07%) | 4 (0.86%) | 6 (0.17%) |  |  |  |
| 11 | Marriage duration |  |  |  | 3.425 | 0.001 | Wilcoxon rank-sum test |
|  | Unmarried | 29 (0.95%) | 14 (3.00%) | 43 (1.23%) |  |  |  |
|  | <1 year | 826 (27.16%) | 149 (31.91%) | 975 (27.79%) |  |  |  |
|  | 1-10 years | 1990 (65.44%) | 283 (60.60%) | 2273 (64.79%) |  |  |  |
|  | ≥10 years | 196 (6.45%) | 21 (4.50%) | 217 (6.19%) |  |  |  |
| 12 | Pregnancy plan |  |  |  | 4.163 | 0.041 | Chi-squared test |
|  | Planned | 2122 (69.78%) | 304 (65.10%) | 2426 (69.16%) |  |  |  |
|  | Unplanned | 919 (30.22%) | 163 (34.90%) | 1082 (30.84%) |  |  |  |
| 13 | Prepregnancy BMI(kg/m2) | 20.70 [19.00;23.10] | 20.20 [18.70;22.45] | 20.70 [18.95;22.90] | 3.080 | 0.002 | Wilcoxon rank-sum test |
| 14 | Smoking history |  |  |  | -2.707 | 0.007 | Wilcoxon rank-sum test |
|  | No | 2992 (98.39%) | 451 (96.57%) | 3443 (98.15%) |  |  |  |
|  | Yes | 49 (1.61%) | 16 (3.43%) | 65 (1.85%) |  |  |  |
| 15 | Smoking during pregnancy |  |  |  | -0.688 | 0.491 | Wilcoxon rank-sum test |
|  | No | 3038 (99.90%) | 466 (99.79%) | 3504 (99.89%) |  |  |  |
|  | Yes | 3 (0.10%) | 1 (0.21%) | 4 (0.11%) |  |  |  |
| 16 | Alcohol use history |  |  |  | -2.612 | 0.009 | Wilcoxon rank-sum test |
|  | No | 2005 (65.93%) | 279 (59.74%) | 2284 (65.11%) |  |  |  |
|  | Yes | 1036 (34.07%) | 188 (40.26%) | 1224 (34.89%) |  |  |  |
| 17 | Alcohol use during pregnancy |  |  |  | -1.479 | 0.139 | Wilcoxon rank-sum test |
|  | No | 3007 (98.88%) | 458 (98.07%) | 3465 (98.77%) |  |  |  |
|  | Yes | 34 (1.12%) | 9 (1.93%) | 43 (1.23%) |  |  |  |
| 18 | Conception method |  |  |  | 0.448 | 0.503 | Chi-squared test |
|  | Natural | 2868 (94.31%) | 444 (95.07%) | 3312 (94.41%) |  |  |  |
|  | ART/IVF | 173 (5.69%) | 23 (4.93%) | 196 (5.59%) |  |  |  |
| 19 | Natural conception prep time |  |  |  | 0.717 | 0.699 | Chi-squared test |
|  | Non-natural | 173 (5.69%) | 23 (4.93%) | 196 (5.59%) |  |  |  |
|  | ≤1year | 2348 (77.21%) | 368 (78.80%) | 2716 (77.42%) |  |  |  |
|  | >1years | 520 (17.10%) | 76 (16.27%) | 596 (16.99%) |  |  |  |
| 20 | Fetal number |  |  |  | 0.009 | 0.923 | Chi-squared test |
|  | Singleton | 2933 (96.45%) | 450 (96.36%) | 3383 (96.44%) |  |  |  |
|  | Multiple | 108 (3.55%) | 17 (3.64%) | 125 (3.56%) |  |  |  |
| 21 | Prior miscarriage stillbirth |  |  |  | 0.825 | 0.409 | Wilcoxon rank-sum test |
|  | None | 2260 (74.32%) | 357 (76.45%) | 2617 (74.60%) |  |  |  |
|  | Once | 546 (17.95%) | 71 (15.20%) | 617 (17.59%) |  |  |  |
|  | Twice | 157 (5.16%) | 26 (5.57%) | 183 (5.22%) |  |  |  |
|  | Three or more times | 78 (2.56%) | 13 (2.78%) | 91 (2.59%) |  |  |  |
| 22 | Prior ectopic pregnancy |  |  |  | - | 0.940 | Fisher's exact test |
|  | None | 2973 (97.76%) | 459 (98.29%) | 3432 (97.83%) |  |  |  |
|  | Once | 62 (2.04%) | 8 (1.71%) | 70 (2.00%) |  |  |  |
|  | Twice | 3 (0.10%) | 0 ( 0.0%) | 3 (0.09%) |  |  |  |
|  | Three or more times | 3 (0.10%) | 0 ( 0.0%) | 3 (0.09%) |  |  |  |
| 23 | Prior induced abortion |  |  |  | 8.671 | 0.034 | Chi-squared test |
|  | None | 2244 (73.79%) | 328 (70.24%) | 2572 (73.32%) |  |  |  |
|  | Once | 598 (19.66%) | 94 (20.13%) | 692 (19.73%) |  |  |  |
|  | Twice | 144 (4.74%) | 28 (6.00%) | 172 (4.90%) |  |  |  |
|  | Three or more times | 55 (1.81%) | 17 (3.64%) | 72 (2.05%) |  |  |  |
| 24 | Prior vaginal delivery |  |  |  | 1.443 | 0.486 | Chi-squared test |
|  | None | 2356 (77.47%) | 368 (78.80%) | 2724 (77.65%) |  |  |  |
|  | Once | 636 (20.91%) | 89 (19.06%) | 725 (20.67%) |  |  |  |
|  | Twice | 49 (1.61%) | 10 (2.14%) | 59 (1.68%) |  |  |  |
| 25 | Prior cesarean |  |  |  | - | 0.248 | Fisher's exact test |
|  | None | 2694 (88.59%) | 428 (91.65%) | 3122 (89.00%) |  |  |  |
|  | Once | 320 (10.52%) | 36 (7.71%) | 356 (10.15%) |  |  |  |
|  | Twice | 22 (0.72%) | 3 (0.64%) | 25 (0.71%) |  |  |  |
|  | Three or more times | 5 (0.16%) | 0 ( 0.0%) | 5 (0.14%) |  |  |  |
| 26 | Previous birth experience rating |  |  |  | 16.917 | 0.005 | Corrected Chi-squared test |
|  | Primipara | 2049 (67.38%) | 340 (72.81%) | 2389 (68.10%) |  |  |  |
|  | Extremely negative | 10 (0.33%) | 5 (1.07%) | 15 (0.43%) |  |  |  |
|  | Negative | 61 (2.01%) | 10 (2.14%) | 71 (2.02%) |  |  |  |
|  | Neutral | 493 (16.21%) | 72 (15.42%) | 565 (16.11%) |  |  |  |
|  | Positive | 338 (11.11%) | 34 (7.28%) | 372 (10.60%) |  |  |  |
|  | Extremely positive | 90 (2.96%) | 6 (1.28%) | 96 (2.74%) |  |  |  |
| 27 | Morning sickness severity |  |  |  | -1.443 | 0.149 | Wilcoxon rank-sum test |
|  | No | 823 (27.06%) | 117 (25.05%) | 940 (26.80%) |  |  |  |
|  | Yes,without medication | 2113 (69.48%) | 325 (69.59%) | 2438 (69.50%) |  |  |  |
|  | Yes,with medication | 105 (3.45%) | 25 (5.35%) | 130 (3.71%) |  |  |  |
| 28 | Fever during pregnancy |  |  |  | 2.176 | 0.337 | Chi-squared test |
|  | No | 2608 (85.76%) | 389 (83.30%) | 2997 (85.43%) |  |  |  |
|  | Yes,without medication | 310 (10.19%) | 54 (11.56%) | 364 (10.38%) |  |  |  |
|  | Yes,with medication | 123 (4.04%) | 24 (5.14%) | 147 (4.19%) |  |  |  |
| 29 | Support from spouse |  |  |  | 7.557 | 0.000 | Wilcoxon rank-sum test |
|  | None | 44 (1.45%) | 8 (1.71%) | 52 (1.48%) |  |  |  |
|  | Minimal | 48 (1.58%) | 23 (4.93%) | 71 (2.02%) |  |  |  |
|  | Moderate | 467 (15.36%) | 125 (26.77%) | 592 (16.88%) |  |  |  |
|  | Strong | 2482 (81.62%) | 311 (66.60%) | 2793 (79.62%) |  |  |  |
| 30 | Support from parents |  |  |  | 6.545 | 0.000 | Wilcoxon rank-sum test |
|  | None | 70 (2.30%) | 24 (5.14%) | 94 (2.68%) |  |  |  |
|  | Minimal | 49 (1.61%) | 20 (4.28%) | 69 (1.97%) |  |  |  |
|  | Moderate | 311 (10.23%) | 76 (16.27%) | 387 (11.03%) |  |  |  |
|  | Strong | 2611 (85.86%) | 347 (74.30%) | 2958 (84.32%) |  |  |  |
| 31 | Support from parents-in-law |  |  |  | 8.021 | 0.000 | Wilcoxon rank-sum test |
|  | None | 121 (3.98%) | 36 (7.71%) | 157 (4.48%) |  |  |  |
|  | Minimal | 102 (3.35%) | 36 (7.71%) | 138 (3.93%) |  |  |  |
|  | Moderate | 463 (15.23%) | 112 (23.98%) | 575 (16.39%) |  |  |  |
|  | Strong | 2355 (77.44%) | 283 (60.60%) | 2638 (75.20%) |  |  |  |
| 32 | Support from siblings |  |  |  | 6.440 | 0.000 | Wilcoxon rank-sum test |
|  | None | 413 (13.58%) | 92 (19.70%) | 505 (14.40%) |  |  |  |
|  | Minimal | 63 (2.07%) | 22 (4.71%) | 85 (2.42%) |  |  |  |
|  | Moderate | 381 (12.53%) | 88 (18.84%) | 469 (13.37%) |  |  |  |
|  | Strong | 2184 (71.82%) | 265 (56.75%) | 2449 (69.81%) |  |  |  |
| 33 | Support from friends |  |  |  | 6.358 | 0.000 | Wilcoxon rank-sum test |
|  | None | 184 (6.05%) | 51 (10.92%) | 235 (6.70%) |  |  |  |
|  | Minimal | 81 (2.66%) | 34 (7.28%) | 115 (3.28%) |  |  |  |
|  | Moderate | 593 (19.50%) | 109 (23.34%) | 702 (20.01%) |  |  |  |
|  | Strong | 2183 (71.79%) | 273 (58.46%) | 2456 (70.01%) |  |  |  |
| 34 | Sleep latency(minutes) | 20.00 [15.00;30.00] | 25.00 [15.00;35.00] | 20.00 [15.00;30.00] | -4.174 | 0.000 | Wilcoxon rank-sum test |
| 35 | Sleep duration(hours) | 8.00 [7.00;8.00] | 7.50 [7.00;8.00] | 8.00 [7.00;8.00] | 4.745 | 0.000 | Wilcoxon rank-sum test |
| 36 | Weekly walking hours during pregnancy(hours) | 4.00 [2.00;5.00] | 3.00 [2.00;5.00] | 4.00 [2.00;5.00] | 2.420 | 0.016 | Wilcoxon rank-sum test |
| 37 | Exercise during pregnancy |  |  |  | 0.787 | 0.375 | Chi-squared test |
|  | Yes | 1159 (38.11%) | 168 (35.97%) | 1327 (37.83%) |  |  |  |
|  | No | 1882 (61.89%) | 299 (64.03%) | 2181 (62.17%) |  |  |  |
| 38 | Spouse ethnicity |  |  |  | 0.000 | 1.000 | Corrected Chi-squared test |
|  | Han | 3012 (99.05%) | 462 (98.93%) | 3474 (99.03%) |  |  |  |
|  | Others | 29 (0.95%) | 5 (1.07%) | 34 (0.97%) |  |  |  |
| 39 | Spouse residence |  |  |  | 0.000 | 0.983 | Chi-squared test |
|  | Native | 2884 (94.84%) | 443 (94.86%) | 3327 (94.84%) |  |  |  |
|  | Others | 157 (5.16%) | 24 (5.14%) | 181 (5.16%) |  |  |  |
| 40 | Spouse age(years) | 30.00 [27.00;32.00] | 29.00 [27.00;32.00] | 30.00 [27.00;32.00] | 1.157 | 0.247 | Wilcoxon rank-sum test |
| 41 | Spouse BMI(kg/m2) | 23.70 [21.70;25.90] | 23.70 [21.50;26.05] | 23.70 [21.60;26.00] | 0.066 | 0.948 | Wilcoxon rank-sum test |
| 42 | Spouse education level |  |  |  | 0.420 | 0.675 | Wilcoxon rank-sum test |
|  | Junior high school or lower | 246 (8.09%) | 43 (9.21%) | 289 (8.24%) |  |  |  |
|  | High school/Vocational school | 723 (23.78%) | 121 (25.91%) | 844 (24.06%) |  |  |  |
|  | College/University | 1948 (64.06%) | 269 (57.60%) | 2217 (63.20%) |  |  |  |
|  | Master's degree or higher | 124 (4.08%) | 34 (7.28%) | 158 (4.50%) |  |  |  |
| 43 | Family history of hyperlipidemia |  |  |  | 0.159 | 0.690 | Chi-squared test |
|  | No | 2759 (90.73%) | 421 (90.15%) | 3180 (90.65%) |  |  |  |
|  | Yes | 282 (9.27%) | 46 (9.85%) | 328 (9.35%) |  |  |  |
| 44 | Family history of schizophrenia |  |  |  | 1.187 | 0.276 | Corrected Chi-squared test |
|  | No | 3034 (99.77%) | 464 (99.36%) | 3498 (99.71%) |  |  |  |
|  | Yes | 7 (0.23%) | 3 (0.64%) | 10 (0.29%) |  |  |  |
| 45 | Family history of depression/anxiety |  |  |  | 1.772 | 0.183 | Chi-squared test |
|  | No | 3010 (98.98%) | 459 (98.29%) | 3469 (98.89%) |  |  |  |
|  | Yes | 31 (1.02%) | 8 (1.71%) | 39 (1.11%) |  |  |  |
| 46 | Depression/anxiety history |  |  |  | 0.025 | 0.875 | Corrected Chi-squared test |
|  | No | 3033 (99.74%) | 465 (99.57%) | 3498 (99.71%) |  |  |  |
|  | Yes | 8 (0.26%) | 2 (0.43%) | 10 (0.29%) |  |  |  |
| 47 | Threatened abortion |  |  |  | 1.056 | 0.304 | Chi-squared test |
|  | No | 2539 (83.49%) | 381 (81.58%) | 2920 (83.24%) |  |  |  |
|  | Yes | 502 (16.51%) | 86 (18.42%) | 588 (16.76%) |  |  |  |
| 48 | Chronic hypertension |  |  |  | 0.000 | 1.000 | Corrected Chi-squared test |
|  | No | 3032 (99.70%) | 466 (99.79%) | 3498 (99.71%) |  |  |  |
|  | Yes | 9 (0.30%) | 1 (0.21%) | 10 (0.29%) |  |  |  |
| 49 | Chronic HTN with SPE |  |  |  | - | 0.604 | Fisher's exact test |
|  | No | 3034 (99.77%) | 467 (100.00%) | 3501 (99.80%) |  |  |  |
|  | Yes | 7 (0.23%) | 0 ( 0.0%) | 7 (0.20%) |  |  |  |
| 50 | Gestational hypertension |  |  |  | 0.016 | 0.898 | Chi-squared test |
|  | No | 2985 (98.16%) | 458 (98.07%) | 3443 (98.15%) |  |  |  |
|  | Yes | 56 (1.84%) | 9 (1.93%) | 65 (1.85%) |  |  |  |
| 51 | Preeclampsia eclampsia |  |  |  | 0.114 | 0.735 | Chi-squared test |
|  | No | 2975 (97.83%) | 458 (98.07%) | 3433 (97.86%) |  |  |  |
|  | Yes | 66 (2.17%) | 9 (1.93%) | 75 (2.14%) |  |  |  |
| 52 | GDM |  |  |  | 4.830 | 0.028 | Chi-squared test |
|  | No | 2773 (91.19%) | 440 (94.22%) | 3213 (91.59%) |  |  |  |
|  | Yes | 268 (8.81%) | 27 (5.78%) | 295 (8.41%) |  |  |  |
| 53 | Pregestational diabetes |  |  |  | - | 1.000 | Fisher's exact test |
|  | No | 3036 (99.84%) | 467 (100.00%) | 3503 (99.86%) |  |  |  |
|  | Yes | 5 (0.16%) | 0 ( 0.0%) | 5 (0.14%) |  |  |  |
| 54 | PROM |  |  |  | 0.103 | 0.748 | Chi-squared test |
|  | No | 2506 (82.41%) | 382 (81.80%) | 2888 (82.33%) |  |  |  |
|  | Yes | 535 (17.59%) | 85 (18.20%) | 620 (17.67%) |  |  |  |
| 55 | ICP |  |  |  | 0.809 | 0.368 | Corrected Chi-squared test |
|  | No | 3020 (99.31%) | 466 (99.79%) | 3486 (99.37%) |  |  |  |
|  | Yes | 21 (0.69%) | 1 (0.21%) | 22 (0.63%) |  |  |  |
| 56 | Placenta previa low-lying |  |  |  | 4.483 | 0.034 | Corrected Chi-squared test |
|  | No | 3025 (99.47%) | 460 (98.50%) | 3485 (99.34%) |  |  |  |
|  | Yes | 16 (0.53%) | 7 (1.50%) | 23 (0.66%) |  |  |  |
| 57 | Placental abruption |  |  |  | 0.000 | 1.000 | Corrected Chi-squared test |
|  | No | 3023 (99.41%) | 464 (99.36%) | 3487 (99.40%) |  |  |  |
|  | Yes | 18 (0.59%) | 3 (0.64%) | 21 (0.60%) |  |  |  |
| 58 | Hypothyroidism |  |  |  | 4.142 | 0.042 | Chi-squared test |
|  | No | 2943 (96.78%) | 460 (98.50%) | 3403 (97.01%) |  |  |  |
|  | Yes | 98 (3.22%) | 7 (1.50%) | 105 (2.99%) |  |  |  |
| 59 | Hyperthyroidism |  |  |  | 0.143 | 0.705 | Corrected Chi-squared test |
|  | No | 3027 (99.54%) | 466 (99.79%) | 3493 (99.57%) |  |  |  |
|  | Yes | 14 (0.46%) | 1 (0.21%) | 15 (0.43%) |  |  |  |
| 60 | Hepatitis |  |  |  | 0.999 | 0.318 | Chi-squared test |
|  | No | 2950 (97.01%) | 449 (96.15%) | 3399 (96.89%) |  |  |  |
|  | Yes | 91 (2.99%) | 18 (3.85%) | 109 (3.11%) |  |  |  |
| 61 | Thrombocytopenia |  |  |  | 0.000 | 1.000 | Corrected Chi-squared test |
|  | No | 3024 (99.44%) | 464 (99.36%) | 3488 (99.43%) |  |  |  |
|  | Yes | 17 (0.56%) | 3 (0.64%) | 20 (0.57%) |  |  |  |
| 62 | Polyhydramnios |  |  |  | 0.295 | 0.587 | Chi-squared test |
|  | No | 2999 (98.62%) | 462 (98.93%) | 3461 (98.66%) |  |  |  |
|  | Yes | 42 (1.38%) | 5 (1.07%) | 47 (1.34%) |  |  |  |
| 63 | Oligohydramnios |  |  |  | 0.590 | 0.443 | Chi-squared test |
|  | No | 2921 (96.05%) | 452 (96.79%) | 3373 (96.15%) |  |  |  |
|  | Yes | 120 (3.95%) | 15 (3.21%) | 135 (3.85%) |  |  |  |
| 64 | Breech transverse position |  |  |  | 0.292 | 0.589 | Chi-squared test |
|  | No | 2942 (96.74%) | 454 (97.22%) | 3396 (96.81%) |  |  |  |
|  | Yes | 99 (3.26%) | 13 (2.78%) | 112 (3.19%) |  |  |  |
| 65 | FGR |  |  |  | 0.024 | 0.877 | Chi-squared test |
|  | No | 2941 (96.71%) | 451 (96.57%) | 3392 (96.69%) |  |  |  |
|  | Yes | 100 (3.29%) | 16 (3.43%) | 116 (3.31%) |  |  |  |
| 66 | Intrauterine infection |  |  |  | 0.010 | 0.922 | Chi-squared test |
|  | No | 2978 (97.93%) | 457 (97.86%) | 3435 (97.92%) |  |  |  |
|  | Yes | 63 (2.07%) | 10 (2.14%) | 73 (2.08%) |  |  |  |
| 67 | Postpartum hemorrhage |  |  |  | 0.031 | 0.860 | Chi-squared test |
|  | No | 2892 (95.10%) | 445 (95.29%) | 3337 (95.13%) |  |  |  |
|  | Yes | 149 (4.90%) | 22 (4.71%) | 171 (4.87%) |  |  |  |
| 68 | Fetal distress |  |  |  | 4.526 | 0.033 | Chi-squared test |
|  | No | 2798 (92.01%) | 416 (89.08%) | 3214 (91.62%) |  |  |  |
|  | Yes | 243 (7.99%) | 51 (10.92%) | 294 (8.38%) |  |  |  |
| 69 | Preterm birth |  |  |  | 1.729 | 0.189 | Chi-squared test |
|  | No | 2935 (96.51%) | 445 (95.29%) | 3380 (96.35%) |  |  |  |
|  | Yes | 106 (3.49%) | 22 (4.71%) | 128 (3.65%) |  |  |  |
| 70 | Delivery mode |  |  |  | 4.098 | 0.129 | Chi-squared test |
|  | Vaginal | 1781 (58.57%) | 252 (53.96%) | 2033 (57.95%) |  |  |  |
|  | Forceps | 170 (5.59%) | 33 (7.07%) | 203 (5.79%) |  |  |  |
|  | Cesarean | 1090 (35.84%) | 182 (38.97%) | 1272 (36.26%) |  |  |  |
| 71 | Birth weight(g) | 3350.00 [3080.00;3620.00] | 3300.00 [3020.00;3600.00] | 3350.00 [3070.00;3620.00] | 1.740 | 0.082 | Wilcoxon rank-sum test |
| 72 | Trial of labor before cesarean |  |  |  | 1.936 | 0.380 | Chi-squared test |
|  | Vaginal delivery | 1954 (64.26%) | 285 (61.03%) | 2239 (63.83%) |  |  |  |
|  | Yes | 251 (8.25%) | 44 (9.42%) | 295 (8.41%) |  |  |  |
|  | No | 836 (27.49%) | 138 (29.55%) | 974 (27.77%) |  |  |  |
| 73 | Delivery mode consistency with expectation |  |  |  | 15.883 | 0.000 | Chi-squared test |
|  | Yes | 2568 (84.45%) | 360 (77.09%) | 2928 (83.47%) |  |  |  |
|  | No | 473 (15.55%) | 107 (22.91%) | 580 (16.53%) |  |  |  |
| 74 | Oxytocin use during labor |  |  |  | 0.308 | 0.579 | Chi-squared test |
|  | Yes | 1344 (44.20%) | 200 (42.83%) | 1544 (44.01%) |  |  |  |
|  | No | 1697 (55.80%) | 267 (57.17%) | 1964 (55.99%) |  |  |  |
| 75 | Epidural analgesia in TOL |  |  |  | 0.061 | 0.805 | Chi-squared test |
|  | Yes | 1681 (55.28%) | 261 (55.89%) | 1942 (55.36%) |  |  |  |
|  | No | 1360 (44.72%) | 206 (44.11%) | 1566 (44.64%) |  |  |  |
| 76 | Family presence during delivery |  |  |  | 0.695 | 0.405 | Chi-squared test |
|  | Yes | 2084 (68.53%) | 329 (70.45%) | 2413 (68.79%) |  |  |  |
|  | No | 957 (31.47%) | 138 (29.55%) | 1095 (31.21%) |  |  |  |
| 77 | Birth experience rating |  |  |  | 7.488 | 0.000 | Wilcoxon rank-sum test |
|  | Traumatic | 209 (6.87%) | 93 (19.91%) | 302 (8.61%) |  |  |  |
|  | Difficult but worthwhile | 1394 (45.84%) | 208 (44.54%) | 1602 (45.67%) |  |  |  |
|  | Smooth | 752 (24.73%) | 110 (23.55%) | 862 (24.57%) |  |  |  |
|  | Very satisfactory | 686 (22.56%) | 56 (11.99%) | 742 (21.15%) |  |  |  |
| 78 | Neonatal congenital anomalies |  |  |  | 0.016 | 0.900 | Corrected Chi-squared test |
|  | Yes | 27 (0.89%) | 5 (1.07%) | 32 (0.91%) |  |  |  |
|  | No | 3014 (99.11%) | 462 (98.93%) | 3476 (99.09%) |  |  |  |
| 79 | Neonatal hospitalization |  |  |  | 2.325 | 0.127 | Chi-squared test |
|  | Yes | 803 (26.41%) | 139 (29.76%) | 942 (26.85%) |  |  |  |
|  | No | 2238 (73.59%) | 328 (70.24%) | 2566 (73.15%) |  |  |  |
| 80 | Feeding method |  |  |  | 2.357 | 0.308 | Chi-squared test |
|  | Exclusive breastfeeding | 1398 (45.97%) | 215 (46.04%) | 1613 (45.98%) |  |  |  |
|  | Formula feeding | 233 (7.66%) | 45 (9.64%) | 278 (7.92%) |  |  |  |
|  | Mixed feeding | 1410 (46.37%) | 207 (44.33%) | 1617 (46.09%) |  |  |  |
| 81 | Nighttime feeding frequency |  |  |  | -2.672 | 0.008 | Wilcoxon rank-sum test |
|  | None | 31 (1.02%) | 7 (1.50%) | 38 (1.08%) |  |  |  |
|  | Once or twice | 1250 (41.10%) | 160 (34.26%) | 1410 (40.19%) |  |  |  |
|  | Three or four times | 1627 (53.50%) | 272 (58.24%) | 1899 (54.13%) |  |  |  |
|  | Five times or more | 133 (4.37%) | 28 (6.00%) | 161 (4.59%) |  |  |  |
| 82 | Antenatal depression(Antenatal EPDS≥10) |  |  |  | 229.542 | 0.000 | Chi-squared test |
|  | No | 2588 (85.10%) | 260 (55.67%) | 2848 (81.19%) |  |  |  |
|  | Yes | 453 (14.90%) | 207 (44.33%) | 660 (18.81%) |  |  |  |
